1 **Title: p63 cooperates with CTCF to modulate chromatin architecture in skin keratinocytes**

2 Jieqiong Qu<sup>1#</sup>, Guoqiang Yi<sup>2#</sup>, Huiqing Zhou<sup>1,3\*</sup>

3

4 **Affiliations:**

5 <sup>1</sup>Department of Molecular Developmental Biology, Faculty of Science, Radboud Institute for  
6 Molecular Life Sciences, Radboud University, Nijmegen, the Netherlands

7 <sup>2</sup>Department of Molecular Biology, Faculty of Science, Radboud Institute for Molecular Life Sciences,  
8 Radboud University, Nijmegen, the Netherlands

9 <sup>3</sup>Department of Human Genetics, Radboud university medical centre, Nijmegen, the Netherlands

10 \* Correspondence: Huiqing Zhou

11 # These authors contribute to the manuscript equally.

12

13

14 E-mail address of all authors:

15 Jieqiong Qu: [jqu@science.ru.nl](mailto:jqu@science.ru.nl)

16 Guoqiang Yi: [guoqiang.yi@science.ru.nl](mailto:guoqiang.yi@science.ru.nl)

17 Huiqing Zhou: [j.zhou@science.ru.nl](mailto:j.zhou@science.ru.nl); [jo.zhou@radboudumc.nl](mailto:jo.zhou@radboudumc.nl)

18

19

20

1 **Abstract**

2 The transcription factor p63 regulates epidermal genes and the enhancer landscape in skin  
3 keratinocytes. Its molecular function in controlling the chromatin structure is however not yet  
4 completely understood. Here we integrated multi-omics profiles, including the transcriptome,  
5 transcription factor DNA-binding and chromatin accessibility, in skin keratinocytes isolated from EEC  
6 syndrome patients carrying p63 mutations, to examine the role of p63 in shaping the chromatin  
7 architecture. We found decreased chromatin accessibility in p63- and CTCF-bound open chromatin  
8 regions that potentially contributed to gene deregulation in mutant keratinocytes. Cooperation of  
9 p63 and CTCF seemed to assist chromatin interactions between p63-bound enhancers and gene  
10 promoters in skin keratinocytes. Our study suggests an intriguing model where cell type-specific  
11 transcription factors such as p63 cooperate with the genome organizer CTCF in the three-  
12 dimensional chromatin space to regulate the transcription program important for the proper cell  
13 identity.

14

15

## 1 Introduction

2 Skin development and homeostasis requires tightly regulated epidermal keratinocyte proliferation,  
3 differentiation and apoptosis, and these processes are governed by cooperation of cis-regulatory  
4 elements, transcription factors (TFs), chromatin accessibility as well as higher-order chromatin  
5 organisation [1-5]. The TF p63 is a key regulator of epidermal development. At the molecular level,  
6 p63 regulates a large number of genes , for example, p21 (*CDKN1A*) in cell cycle arrest [6], *Fras1* in  
7 maintaining basement membrane integrity [7] and key genes such as keratins, filaggrin, and loricrin  
8 required for epidermal morphogenesis and differentiation [1, 8]. Furthermore, p63 directly regulates  
9 chromatin factors, *Satb1*, *Lsh*, and *Brg1*, to control the chromatin remodelling during epidermis  
10 development [9-11]. Recent studies showed that p63 exerts a crucial role in establishing the  
11 enhancer landscape [4, 5, 12, 13]. Through active enhancers, p63 cooperates with its co-regulating  
12 TFs to modulate local transcriptional program required for epidermal homeostasis [4].

13 In human, heterozygous mutations of *TP63* encoding p63 cause a spectrum of ectoderm-related  
14 disorders [14]. For example, Ectrodactyly-Ectodermal Dysplasia-Cleft Lip/Palate (EEC) syndrome is  
15 caused by point mutations located in the p63 DNA-binding domain, and manifests ectodermal  
16 dysplasia with defects in the epidermis and epidermal related appendages, limb malformation and  
17 cleft lip/palate. Five hotspot mutations affecting amino acids, R204, R227, R279, R280 and R304,  
18 cover approximately 90% of the all EEC syndrome cases [15]. Our previous study showed that  
19 mutant p63 resulted in a genome-wide redistribution of enhancers in keratinocytes established from  
20 EEC patients [13]. Consistently, the gene network analysis identified a significant co-expression gene  
21 module of 'nucleosome assembly', implying a less-organized chromatin structure in EEC syndrome  
22 keratinocytes [13]. How mutant p63 affects the chromatin structure is however not yet clear.

23 In this study, we characterized the chromatin accessibility using ATAC-seq in keratinocytes  
24 established from EEC patients carrying p63 mutations, in comparison with control keratinocytes. A  
25 clear difference in chromatin accessibility that correlated with the transcriptional dynamics was  
26 detected. Unexpectedly, strong enrichment of CTCF binding sites were observed at control-specific  
27 open chromatin regions. By combining published promoter Capture Hi-C seq data, we found that  
28 CTCF and p63 were cooperatively involved in DNA loops to regulate epidermal genes. Our findings  
29 provide new insights into the coordinated regulatory role of CTCF and p63 in chromatin interactions  
30 in epidermal keratinocytes.

31

32

## 1 Results

### 2 Differential chromatin accessibility between control and p63 mutant keratinocytes

3 We performed Assay for Transposase-Accessible Chromatin with high-throughput sequencing (ATAC-  
4 seq) to characterize the accessible genome as well as the nucleosome position in both control and  
5 p63 mutant keratinocytes at the proliferation stage. Two replicas of ATAC-seq analyses showed high  
6 correlation (Figure 1A), indicating high reproducibility. The principle component analysis (PCA) plot  
7 based on the chromatin accessibility displayed a clear separation between control and p63 mutant  
8 keratinocytes (Figure 1B), which is highly consistent with results from gene expression profiles  
9 (Figure 1B). The PCA analysis also showed that the genome accessibility of the two p63 mutant lines  
10 (R204W and R304W) are similar, as they are close on the PC1 axis that represents major variations.  
11 As the goal of this work is to examine the difference between control and EEC mutant lines, these  
12 two mutant lines were considered as one group, termed as p63 mutant keratinocytes, in the  
13 following analyses.

14 Subsequently we identified the differential open chromatin regions (OCRs) marked by ATAC-seq  
15 signals between control and p63 mutant keratinocytes. In total, there were 2,492 open chromatin  
16 regions that showed higher signal in control keratinocytes, termed as control-specific open  
17 chromatin regions (Ctr-OCRs); in parallel, there were 3,716 regions that showed higher signal in  
18 mutant keratinocytes, termed as mutant-specific open chromatin regions (Mt-OCRs) (Figure 1C). As  
19 expected, we found that differential OCRs were positively correlated with gene expression, when  
20 they were assigned to the nearest differentially expressed (DE) genes (Figure 1C). Genes associated  
21 with Ctr-OCRs were mainly involved in the regulation of 'cell cycle' (Figure 1D), e.g. *CDC7* (Figure 1E),  
22 while genes nearby Mt-OCRs were mainly enriched in 'actin filament-based process' (Figure 1D), e.g.  
23 *FAP* (Figure 1E).

### 24 p63 and CTCF occupancy at Ctr-OCRs

25 To identify the potential TFs involved in these differential OCRs, we first performed a comparative  
26 motif analysis between control and p63 mutant keratinocytes using HOMER. Among the Ctr-OCRs,  
27 we found that p63 motif is most enriched (Figure 2A), which is consistent with our previous finding  
28 that loss of p63 binding resulted in decreased enhancers in p63 mutant keratinocytes [13].  
29 Unexpectedly, the motif of CTCF that is a well-known genome organizer [16] was identified as the 2<sup>nd</sup>  
30 highly enriched motif in the Ctr-OCRs. Among the Mt-OCRs, AP-1 motif family was most enriched  
31 (Figure 2B), consistent with findings on gained enhancers in p63 mutant keratinocytes [13].

1 To validate our motif analysis result and explore the role of p63 in controlling Ctr-OCRs, we used  
2 published p63 ChIP-seq data from our previous work [13]. In control keratinocytes, a total of 1,223  
3 p63 binding sites (BSs) were covered by the 2,492 Ctr-OCRs, showing a significant overlap ( $p < 0.001$ ).  
4 When ATAC-seq and p63 ChIP-seq reads were mapped to the 1,223 p63-bound Ctr-OCRs, we found a  
5 decrease of both chromatin accessibility and p63 binding signals at the p63-bound Ctr-OCRs in p63  
6 mutant keratinocytes (Figure 2C).

7 To confirm the role of CTCF in Ctr-OCRs, we performed CTCF ChIP-seq in both control and p63  
8 mutant keratinocytes. In total, we found 12,116 CTCF BSs, among which only 363 were differential in  
9 CTCF binding between control and p63 mutant keratinocytes ( $p < 0.05$ ), indicating that CTCF binding  
10 is rather stable. In addition, among all putative CTCF BSs, we found 376 overlapped with the 2,492  
11 Ctr-OCRs, which is statistically significant ( $p < 0.001$ ). We then mapped ATAC-seq and CTCF ChIP-seq  
12 reads to the 376 CTCF-bound Ctr-OCRs. As expected, decrease of ATAC-seq signals was observed at  
13 the CTCF-bound Ctr-OCRs in p63 mutant keratinocytes. However, unexpectedly, there was no  
14 significant change in CTCF binding signals at the CTCF-bound Ctr-OCRs in p63 mutant keratinocytes,  
15 as compared to the control keratinocytes (Figure 2D). Another expected finding was that there is few  
16 overlap ( $N=435$ ) out of 45,350 p63 BSs and 12,116 CTCF BSs (Supplementary Figure 1A), although  
17 both motifs were identified in Ctr-OCRs. Consistently, there was no visible CTCF binding signal at all  
18 p63 BSs, and vice versa, no visible p63 binding at the CTCF BSs (Supplementary Figure 1B).  
19 Consistently, we also observed decreased p63 binding and largely unchanged CTCF binding signal in  
20 p63 mutant keratinocytes at the co-localized binding sites (Supplementary Figure 1C).

21 Subsequently, we analyzed the nucleosome positioning at p63-bound and CTCF-bound Ctr-OCRs by  
22 mapping the distribution of ATAC-seq fragments centered on either p63 motif or CTCF motif (Figure  
23 2E). In control keratinocytes, we found an enrichment of short fragments ( $< 150$  bp) surrounding  
24 both p63 motif and CTCF motif. The enrichment of such short reads clearly decreased in p63 mutant  
25 keratinocytes (Figure 2E and Supplementary Figure 2). We also observed an enrichment of  
26 fragments that had lengths slightly shorter than 200 bp which represent the stable flanking  
27 nucleosomes in control keratinocytes. However, in p63 mutant keratinocytes, the approximate 200  
28 bp length-fragments seemed to be less present (Supplementary Figure 2), indicating an altered  
29 nucleosome organization.

30 Taken together, we observed decreased accessibility at p63-bound and CTCF-bound Ctr-OCRs in p63  
31 mutant keratinocytes when compared to control keratinocytes. Notably, there was a clear decrease  
32 of p63 binding at the p63-bound Ctr-OCRs whereas CTCF binding did not seem to be affected at the  
33 CTCF-bound Ctr-OCRs in p63 mutant keratinocytes.

## 1 **Characterization of p63-bound OCRs and CTCF-bound OCRs**

2 We reasoned that the chromatin states and the genomic locations of these Ctr-OCRs might be  
3 informative to understand the difference between p63-bound and CTCF-bound Ctr-OCRs. To this  
4 end, we firstly analyzed the chromatin states (CSs) of all CTCF and p63 BSs with the combination of  
5 six histone marks from Roadmap project [17] (Figure 3A). We found that p63 bound to both  
6 promoters and enhancers marked by H3K27ac and H3K4me1, whereas CTCF was more enriched at  
7 promoters marked by H3K4me3 (Figure 3A and Supplementary Figure 3). We then performed  
8 analyses on the p63- and CTCF-bound Ctr-OCRs (Figure 3B). When comparing to all Ctr-OCRs, p63-  
9 bound Ctr-OCRs were overrepresented at enhancers (CSs 8, 9, and 11) while the majority of CTCF-  
10 bound Ctr-OCRs showed overrepresentation at promoter proximal regions (CSs 2 and 4, Figure 3B),  
11 consistent with all p63 and CTCF BSs.

12 Next, to analyze the localization of p63-bound and CTCF-bound Ctr-OCRs in regulatory chromatin  
13 interactions, we utilized the Promoter Capture Hi-C (PCHiC) data and TAD (topologically associating  
14 domain) regions from published HiC data in keratinocytes [18]. In the PCHiC, promoters were used  
15 as baits to capture the interacting genomic regions. In total, this PCHiC dataset captured 119,648  
16 interactions, including 103,497 (86.5%) promoter-enhancer loops and 16,151 (13.5%) promoter-  
17 promoter loops (Figure 3C). As p63 plays a more prominent role at enhancers (Figure 3A) [4], we  
18 focused on promoter-enhancer loops. These loops had a median loop size of 250.9 kb (Figure 3D).  
19 Among the previously defined 1,223 p63-bound Ctr-OCRs (Figure 2C), 388 of them were located at  
20 the anchors of 1,674 loops, at either the promoter or the enhancer, and on average one p63-bound  
21 Ctr-OCR was connected by ~4.3 loops. Similarly, among the 376 CTCF-bound Ctr-OCRs (Figure 2D),  
22 191 of them were located at the anchors of 1,093 loops; on average, one CTCF-bound Ctr-OCR was  
23 connected by ~5.7 loops. Therefore, CTCF-bound Ctr-OCRs at anchors were connected by more loops.

24 Furthermore, we found that CTCF-bound Ctr-OCRs located at loop anchors were more enriched for  
25 promoters (~ 4 fold) (Figure 3E), consistent with all CTCF BSs and all CTCF Ctr-OCRs. In contrast, p63-  
26 bound Ctr-OCRs associated with loops were enriched in both promoters and enhancers to a similar  
27 extent (Figure 3E), which is different from all p63 BSs and all p63-bound Ctr-OCRs that were only  
28 enriched at enhancers (Figure 3B). We also examined whether p63- and CTCF-bound Ctr-OCRs were  
29 localized at the TAD boundaries. As expected, CTCF-bound Ctr-OCRs showed ~2.5 fold enrichment  
30 for TAD boundaries, whereas p63-bound Ctr-OCRs were depleted of TAD boundaries (Figure 3E).

31 Randomization by reshuffling genomic regions with same sizes did not show any enrichment in TAD  
32 boundaries, promoters or enhancers. As CTCF-bound Ctr-OCRs were enriched at the promoters and  
33 p63-bound Ctr-OCRs were enriched at both promoters and enhancers, it is plausible that p63-bound

1 enhancers interact with CTCF-bound promoters to regulate genes through DNA looping and a subset  
2 of these loops may be affected by p63 mutations.

### 3 **p63 and CTCF mediate a subset of loops to regulate transcription**

4 To assess how p63 and CTCF cooperates via DNA looping to regulate gene expression, we performed  
5 further analyses using previously published gene expression data [13] to examine the relation  
6 between gene expression and DNA looping. In control keratinocytes, we defined highly expressed  
7 genes by quartiles to four groups using their transcriptional levels (Q1-4, FPKM  $\geq 1$ ), and another  
8 group with lowly expressed genes (Q0, FPKM  $< 1$ ). We detected an increasing number of associated  
9 loops with elevated gene expression levels (Figure 4A). This suggests that highly expressed genes  
10 may be more indispensable of regulation through loops, which is line with previous study showing  
11 multi-loop activation hubs at key regulatory genes [19]. Moreover, the differentially expressed genes  
12 between control and p63 mutant keratinocytes (Figure 1B) were associated with significantly more  
13 loops ( $p < 0.001$ ) than all expressed genes (Figure 4B). We also performed the same analysis among  
14 loops with either p63-bound or CTCF-bound Ctr-OCRs. Similar results were found, although in these  
15 comparisons the difference was not significant, probably due to the low number of associated loops  
16 (Figures 4C and D).

17 We then mapped 388 p63-bound and 191 CTCF-bound Ctr-OCRs which are located at loop anchors  
18 to their target genes by identifying their interacting gene promoters located at anchors of the other  
19 end of the loops. In some cases, Ctr-OCRs were located in promoters, and the associated genes were  
20 considered as target genes. In total, 388 p63-bound Ctr-OCRs interacted with 304 gene promoters  
21 while 191 CTCF-bound Ctr-OCRs interacted with 500 gene promoters through looping interactions,  
22 indicating that on average a CTCF-bound Ctr-OCR is involved in the regulation of more genes than a  
23 p63-bound Ctr-OCR. There was a significant ( $p < 0.001$ ) overlap ( $N = 96$ ) of genes that were  
24 potentially regulated by p63- and CTCF-bound Ctr-OCRs (Figure 4E). These 96 genes represent genes  
25 connected by the promoter-enhancer loops that were anchored by both p63-bound and CTCF-bound  
26 Ctr-OCRs and that may be affected in p63 mutant keratinocytes. As the three-dimensional chromatin  
27 landscape is relatively stable, we reasoned that the difference of the chromatin landscape in control  
28 and p63 mutant keratinocytes may influence gene expression during keratinocyte differentiation  
29 [18]. Therefore, we examined the expression of these 96 genes using previously reported differential  
30 gene expression in control and p63 mutant keratinocytes during differentiation [13]. Indeed we  
31 found that 39 of these 96 genes showed deregulation ( $p < 0.001$ ). Notably many of the 96 genes  
32 were involved in 'epidermal cell differentiation', e.g. *KRT5*, *KRT75*, and *B9D1* (Figure 4F).

1 Next, we dissected how p63-bound and CTCF-bound Ctr-OCRs at loop anchors co-regulated these 96  
2 genes: whether p63-bound and CTCF-bound Ctr-OCRs were involved in the same or different  
3 promoter-enhancer loops. We found that 60 genes were regulated by promoter-enhancer loops  
4 where p63-bound and CTCF-bound Ctr-OCRs were both located at the anchors in the same loops,  
5 although they may co-localized in different manner (Figure 4G). Among these 60 genes, 26 showed  
6 differential expression between control and p63 mutant keratinocytes during differentiation, with  
7 *PIGV* and *KRT5* shown as examples (Figures 4I and J). Among the loops associated with the 60 genes,  
8 the case where p63-bound Ctr-OCR was located at one anchor while CTCF-bound Ctr-OCR was  
9 located at the other anchor of the loop counted for 12.6% (Figure 4G, (1)). In the majority of the  
10 cases, both p63-bound and CTCF-bound Ctr-OCRs were present either at the promoter (70.6%)  
11 (Figure 4G, (2)) or at the enhancer (16.8%) (Figure 4G, (3)). Interestingly, for the rest 36 genes gene  
12 promoters were connected with both p63-bound and CTCF-bound Ctr-OCRs from different loops  
13 (Figure 4H), suggesting that enhancers occupied by p63-bound and CTCF-bound Ctr-OCRs can co-  
14 regulate the same gene through different loops. Among these 36 genes, 13 were deregulated in p63  
15 mutant keratinocytes during differentiation.

16



## 1 Discussion

2 Over the years, molecular understanding of p63 function in keratinocytes has led to the  
3 identification of numerous target genes including chromatin factors [20-22] as well as of a solid role  
4 of p63 in orchestrating the enhancer landscape [4, 5, 23]. However, whether p63 is involved in the  
5 direct regulation of chromatin architecture is not known. In this study, we characterized the  
6 chromatin accessibility with ATAC-seq in both control and EEC syndrome patient keratinocytes  
7 carrying p63 mutations (R204W and R304W). Interestingly, we found decreased chromatin  
8 accessibility in p63- and CTCF-bound open chromatin regions in mutant p63 keratinocytes. These  
9 less accessible chromatin regions interact with epidermal gene promoters and potentially regulate  
10 gene expression. Collectively, we proposed an unreported role of p63 ~~directly~~ cooperating with CTCF  
11 in chromatin interactions.

12 It is envisaged that p63 is a key factor in skin keratinocytes [4, 5, 24]. Ample studies have shown that  
13 the proper regulation of gene expression by p63 through the precise control of enhancers is  
14 essential for maintaining the epidermal cell identity [4, 13, 25, 26]. It is equally important that p63  
15 requires additional co-regulating TFs to regulate transcription. Several studies reported p63 co-  
16 regulating TFs, e.g. AP1, AP2, STAT5, and RFX5 [20, 22, 23, 27], which are essential for the epidermal  
17 gene expression in a temporal and spatial manner [4, 28]. Besides, p63 interacts with the chromatin  
18 remodelling factor BAF1 to maintain the open chromatin regions [5] and with Dnmt3a to locate  
19 enhancers [12]. In this study, we found that CTCF, a well-known TF maintaining the chromatin  
20 architecture, is also a p63 co-regulating TF modulating a subset of chromatin loops. However, this  
21 cooperation is probably not through direct protein-protein interactions but mainly bridging  
22 enhancers and promoters, given the few overlap observed between p63 and CTCF BSs. It is known  
23 that the majority of p63-bound regions are located in intergenic or intragenic regions (enhancers)  
24 rather than promoters [22], and therefore how p63-bound enhancers interact with gene promoters  
25 is an interesting question. Our current study provides the first line of evidence that the cooperation  
26 with CTCF assists the looping of p63-bound enhancers to gene promoters.

27 The observation of the enriched CTCF motif in Ctr-OCRs detected in our ATAC-seq analyses was  
28 somewhat unexpected. Our previous enhancer-centred analysis that focused on H3K27ac enriched  
29 genomic regions did not capture CTCF motifs [4, 13], probably due to the fact that CTCF is more  
30 enriched in open chromatin regions depleted of H3K27ac but enriched for H3K4me3 signal (Figure  
31 3A and Supplementary Figure 3). Interestingly, detecting the CTCF motif in Ctr-OCRs in keratinocytes  
32 is in line with the previous finding that the motif of YY1 was enriched in p63-bound sequences [27].  
33 YY1 has been shown to co-localize with CTCF and stabilize chromatin looping [29, 30].

1 CTCF maintains the genome organization by occupying the boundaries of megabase-scale TADs, and  
2 functions as an insulator to block enhancer-promoter interactions between different TADs [16]. Our  
3 data showed that, in addition to demarcating TADs, CTCF mediates promoter-enhancer loops, often  
4 located in promoter-proximal regions (Figure 3E), to facilitate the promoter-enhancer interactions  
5 within one TAD. This is in line with the concept that a subpopulation of CTCF associates with the RNA  
6 polymerase II (Pol II) protein complex to activate transcription [31]. It is likely that CTCF helps to  
7 bridge the p63-bound enhancers to transcription start site-proximal regulatory elements and to  
8 initiate transcription by interacting with Pol II, thus supporting a role of CTCF in facilitating contacts  
9 between transcription regulatory sequences. This model has been demonstrated by the previous  
10 work on the beta-globin locus [32]. To get a clearer picture, technologies that are similar to ChIA-PET  
11 [33], such as HiChIP [34], would be useful to understand long-range contacts associated with CTCF or  
12 p63 in skin keratinocytes.

13 The three-dimensional chromatin landscape is relatively stable once established in a specific cell  
14 type, probably during cell commitment, and cell-type-specific looping structures mainly control the  
15 accessibility of enhancers to their specific targets [35]. Recent studies showed that cell type-specific  
16 TFs are involved in regulation of DNA looping in macrophage development, which shed light on the  
17 role of cell type-specific TFs in regulating chromatin interactions [19]. Here we proposed that a  
18 number of loci nearby epidermal genes were organized into a 'regulatory chromatin hub' within the  
19 chromatin interactions mediated by CTCF in epidermal keratinocytes (Figure 5A). Such hubs contain  
20 multiple connecting DNA loops that require not only CTCF binding that is rather static but also  
21 binding of cell type-specific TFs (e.g. p63) for the transcriptional activity. In this model, cell type-  
22 specific TFs may be essential to make the DNA loops active in transcription. This hypothesis is  
23 consistent with our observation that unchanged CTCF binding signal but decreased accessibility in  
24 the CTCF-bound Ctr-OCRs in p63 mutant keratinocytes (Figure 2D).

25 Moreover, our observations shed light on the chromatin-based mechanisms underlying EEC  
26 syndrome caused p63 mutations. These EEC mutations, such as R204W and R304W, were shown to  
27 disrupt p63 DNA binding, resulting in impaired transactivation activity and loss of epidermal cell  
28 identity [13, 36, 37]. Our data suggest that deregulated function of DNA loops mediated by p63 and  
29 CTCF represents an additional layer to the disease mechanism (Figure 5B). Given that CTCF binding  
30 did not change, it is likely that the looping interactions are static, but the looping is no longer active  
31 due to the absence of p63 binding (Figure 5B (1)). Therefore, the epidermal genes were down-  
32 regulated and p63 mutant keratinocytes showed loss of epidermal cell identity [13]. On the other  
33 hand, it is also possible that the loop ablation as a result of lost p63 binding leads to the decreased

1 accessibility at CTCF-bound promoters and deregulated gene expression in p63 mutant keratinocytes  
2 (Figure 5B (2)). The latter scenario suggests p63 is the key factor determining the regulatory activity  
3 of such promoter-enhancer interactions. Nevertheless, how p63 mutations affect the cooperation  
4 between p63 and CTCF and gene expression is still unclear. Among the 96 genes with loops  
5 connected by p63- and CTCF-bound Ctr-OCRs, only 39 of them were deregulated in p63 mutant  
6 keratinocytes. It is possible that ‘shadow enhancers’ that are composed of clusters of enhancer and  
7 contribute to robust gene transcription [38, 39], are involved in regulation of the 57 genes that are  
8 not deregulated in mutant keratinocytes. Further experiments are required to test these hypotheses.

9 Taken together, our results highlight the cooperation of p63 and CTCF in mediating DNA loops as  
10 well as gene regulation. These observations provide new insights into the general regulatory role of  
11 chromatin looping which depends on the coordination of CTCF and cell type-specific TFs such as p63  
12 in skin keratinocytes.

13

## 1 **Material and methods**

### 2 **Ethics statement**

3 All procedures for establishing and maintaining human primary keratinocytes were approved by the  
4 ethical committee of the Radboud university medical center (“Commissie Mensgebonden Onderzoek  
5 Arnhem-Nijmegen”). Informed consent was obtained from all donors of a skin biopsy.

### 6 **Human primary keratinocyte culture**

7 Primary keratinocytes were established previously from skin biopsies of three EEC syndrome  
8 patients carrying heterozygous mutations in the p63 DNA-binding domain, R204W[40] and R304W  
9 [37], as well as of non-EEC volunteers (Dombi23, referred to as control) [41]. R204W and R304W are  
10 treated as a p63 mutant group for further analyses to minimize the effect from individual difference.  
11 As previously described [42], primary keratinocytes were cultured in Keratinocyte Basal Medium  
12 (KBM, Lonza #CC-4131) supplemented with 100 U/mL Penicillin/Streptomycin (Gibco Life Technology  
13 #15140122), 0.1 mM ethanolamine (Sigma Aldrich #141-43-5), 0.1 mM O-phosphoethanolamine  
14 (Sigma Aldrich #1071-23-4), 0.4% (vol/vol) bovine pituitary extract, 0.5 µg/mL hydrocortisone, 5  
15 µg/mL insulin and 10 ng/mL epidermal growth factor (Lonza #CC-4131). Medium was refreshed  
16 every other day. When cells were more than 90% confluent, cells were collected at the proliferation  
17 stage. No mycoplasma contamination is found during cell culture.

### 18 **ATAC-seq**

19 ATAC libraries of the control and p63 mutant keratinocytes were prepared by a documented  
20 protocol [43]. In brief, keratinocytes were treated with Accutase® solution on plates and well re-  
21 suspended into single cells. Pellet cells for 5 min at 500 g. After twice wash with ice-cold PBS, pellet  
22 the cells again. Re-suspend cells and take out 100,000 cells for lysis with ice-cold freshly made lysis  
23 buffer (containing 10 mM Tris-HCl pH 7.5, 10 mM NaCl, 3 mM MgCl<sub>2</sub> and 0.1% IGEPAL CA-630  
24 detergent). Then perform tagmentation using 2 µl of Tn5 transposase and 12.5 µl 2 × TD buffer  
25 (Illumina #FC-121-1031) at 37°C for 1h with 650 rpm shaking. The resulted DNA fragments  
26 underwent two sequential seven-cycle PCR amplification, and in between the libraries were selected  
27 for <500 bp fragments using SPRI beads. The final PCR products were purified with QIAquick PCR  
28 Purification Kit (QIAGEN #28106) and quantified with the KAPA Library Quantification Kit (Kapa  
29 Biosystems #KK4844), and then sequenced in a paired-ended manner using the NextSeq 500  
30 (Illumina) according to standard Illumina protocols.

### 31 **CTCF ChIP-seq**

1 Chromatin for ChIP was prepared as previously described [20]. ChIP assays were performed  
2 following a standard protocol [44] with minor modifications. On average, 0.5M keratinocytes were  
3 used in each ChIP. 4x ChIP reactions are pooled to prepare one ChIP-seq sample. Antibodies against  
4 CTCF (Millipore #07-729, 5ul) was used in each ChIP assay. Resulted DNA fragments from four  
5 independent ChIP assays were purified with QIAquick PCR Purification Kit (QIAGEN #28106).  
6 Afterwards, 5 ng DNA fragments were pooled and proceeded on with library construction using  
7 KAPA Hyper Prep Kit (Kapa Biosystems #KK8504) according to the standard protocol. The prepared  
8 libraries were then sequenced using the NextSeq 500 (Illumina) according to standard Illumina  
9 protocols.

#### 10 **RNA-seq data analysis**

11 Paired-end RNA-seq reads were mapped to the human genome hg19 using STAR aligner[45] in two-  
12 pass mode with default parameters, and enumerate stranded gene-level read counts at the same  
13 time. The generated count matrix was used as input for DESeq2 package [46] to distinguish  
14 differential expressed genes between control and mutant keratinocytes. These genes greater than  
15 1.5-fold changed at adjusted  $p$  value  $< 0.05$  were considered significantly deregulated.

#### 16 **ChIP-seq and ATAC-seq data analysis**

17 Sequenced reads were aligned against the UCSC hg19 human reference genome with Burrows-  
18 Wheeler Aligner (BWA) program with default parameters [47]. The potential PCR and optical  
19 duplicates were removed using Picard *MarkDuplicates* option. The filtered BAM files were inputted  
20 to MACS2 [48] for peak calling. The p63 ChIP-seq data was published and re-analyzed in this study  
21 [13]. The p63, CTCF and H3K27ac were called using the narrow setting (default) with a q-value of  
22 0.01. For ATAC-seq, the open chromatin regions were predicted using default parameters except for  
23 using -f BAMPE option. Peaks overlapping with the consensus excludable ENCODE blacklist were  
24 dropped to avoid confounding by repetitive regions. All alignment files were extended to 200-bp and  
25 scaled to RPKM-normalized read coverage files using deepTools [49] for visualization. To compare  
26 binding profiles between different samples unbiasedly, we applied library size factors estimated  
27 from DESeq2 [46] on RPKM values.

28 Differentially accessible regions were detected using DESeq2 package [46] with fold change less than  
29 2.0 and p-value below 0.05. Differential motif analysis in the differential DHSs was employed by the  
30 findMotifs function in HOMER tool (<http://homer.salk.edu/homer/motif/>) with other default  
31 parameters, which can normalize the background sequences to remove GC-bias. The BEDtools suite

1 (<https://bedtools.readthedocs.io/en/latest/content/bedtools-suite.html>) was used to test overlap  
2 and enrichment between different intervals.

### 3 **Dimensionality reduction and functional annotation**

4 For visualization, top 1,000 variable genes were first selected based on interquartile range (IQR) of  
5 normalized expression values, and further used to reduce dimensionality (principal component  
6 analysis) of the dataset by `pca` function in R. Functional enrichment was evaluated by Metascape  
7 online tool [50], to gain insight into the biological functions for deregulated genes. Only these  
8 functional terms with Benjamini-adjusted p-value < 0.05 were considered significantly  
9 overrepresented.

### 10 **Capture Hi-C data processing**

11 Raw Promoter Capture Hi-C sequencing reads from GSE84662 were processed using the HiCUP  
12 pipeline [51], like quality control, alignment to hg19 and reads filtering. Technical replicates were  
13 merged and de-duplicated, and then pooled biological replicates was then jointly used for  
14 interaction identification with CHiCAGO [52] and the associated `chicagoTools` suite. All significant  
15 interactions were defined based on a strict interaction threshold (CHiCAGO score  $\geq 5$ ).

16 Briefly, CHiCAGO predicts interactions based on a convolution background model reflecting both  
17 'Brownian' (real, but expected interactions) and 'technical' (assay and sequencing artifacts)  
18 components. The putative p values are corrected using a weighted false discovery control procedure  
19 that specifically accommodates the fact that increasingly larger numbers of tests are performed at  
20 regions where progressively smaller numbers of interactions are expected. The weights were  
21 learned based on the decrease of the reproducibility of interaction calls between the individual  
22 replicates of macrophage samples with distance. Interaction scores were then computed for each  
23 fragment pair as  $-\log$ -transformed, soft-thresholded, weighted p values.

24

25

26

1 **Author Contributions**

2 JQ, GY and HZ conceived and designed the experiments. JQ, GY, HZ wrote and revised the  
3 manuscript. JQ performed the experiments. JQ, GY and HZ analysed the data.

4 **Acknowledgements**

5 We thank Eva Janssen-Megens, Siebe van Genesen and Rita Bylsma for operating the Illumina  
6 analyzer. We thank the ENCODE Consortium for sharing their data.

7 **Competing interests**

8 None of the authors have any competing interests in the manuscript.

9 **Data availability**

10 To review our complete dataset GEO accession GSE123711  
11 (<https://www.ncbi.nlm.nih.gov/geo/query/acc.cgi?acc=GSE123711>). All data supporting the findings  
12 of the study and in-house codes are available on request.

13 **Ethics approval and consent to participate**

14 Not applicable.

15 **Declarations:**

16 **Consent for publication**

17 Not applicable.

18 **Funding**

19 This research was supported by Netherlands Organisation for Scientific Research  
20 (NWO/ALW/MEERVOUD/836.12.010, HZ), Radboud University fellowship (HZ) and Chinese  
21 Scholarship Council grant 201406330059 (JQ).

22

23

24

25

26

## 1 References

- 2 1. Truong AB, Kretz M, Ridky TW, Kimmel R, Khavari PA: **p63 regulates proliferation and**  
3 **differentiation of developmentally mature keratinocytes.** *Genes Dev* 2006, **20**(22):3185-  
4 3197.
- 5 2. Lippens S, Denecker G, Ovaere P, Vandenabeele P, Declercq W: **Death penalty for**  
6 **keratinocytes: apoptosis versus cornification.** *Cell death and differentiation* 2005,  
7 **12**(S2):1497.
- 8 3. Botchkarev VA, Flores ER: **p53/p63/p73 in the epidermis in health and disease.** *Cold Spring*  
9 *Harbor perspectives in medicine* 2014, **4**(8):a015248.
- 10 4. Kouwenhoven EN, Oti M, Niehues H, van Heeringen SJ, Schalkwijk J, Stunnenberg HG, van  
11 Bokhoven H, Zhou H: **Transcription factor p63 bookmarks and regulates dynamic enhancers**  
12 **during epidermal differentiation.** *EMBO Rep* 2015, **16**(7):863-878.
- 13 5. Bao X, Rubin AJ, Qu K, Zhang J, Giresi PG, Chang HY, Khavari PA: **A novel ATAC-seq approach**  
14 **reveals lineage-specific reinforcement of the open chromatin landscape via cooperation**  
15 **between BAF and p63.** *Genome Biol* 2015, **16**(1):284.
- 16 6. LeBoeuf M, Terrell A, Trivedi S, Sinha S, Epstein JA, Olson EN, Morrissey EE, Millar SE: **Hdac1**  
17 **and Hdac2 act redundantly to control p63 and p53 functions in epidermal progenitor cells.**  
18 *Dev Cell* 2010, **19**(6):807-818.
- 19 7. Koster MI, Dai D, Marinari B, Sano Y, Costanzo A, Karin M, Roop DR: **p63 induces key target**  
20 **genes required for epidermal morphogenesis.** *Proceedings of the National Academy of*  
21 *Sciences* 2007, **104**(9):3255-3260.
- 22 8. Romano R-A, Ortt K, Birkaya B, Smalley K, Sinha S: **An active role of the ΔN isoform of p63 in**  
23 **regulating basal keratin genes K5 and K14 and directing epidermal cell fate.** *PloS one* 2009,  
24 **4**(5):e5623.
- 25 9. Fessing MY, Mardaryev AN, Gdula MR, Sharov AA, Sharova TY, Rapisarda V, Gordon KB,  
26 Smorodchenko AD, Poterlowicz K, Ferone G *et al*: **p63 regulates Satb1 to control tissue-**  
27 **specific chromatin remodeling during development of the epidermis.** *J Cell Biol* 2011,  
28 **194**(6):825-839.
- 29 10. Mardaryev AN, Gdula MR, Yarker JL, Emelianov VU, Poterlowicz K, Sharov AA, Sharova TY,  
30 Scarpa JA, Joffe B, Solovei I *et al*: **p63 and Brg1 control developmentally regulated higher-**  
31 **order chromatin remodelling at the epidermal differentiation complex locus in epidermal**  
32 **progenitor cells.** *Development* 2014, **141**(1):101-111.
- 33 11. Keyes WM, Pecoraro M, Aranda V, Vernersson-Lindahl E, Li W, Vogel H, Guo X, Garcia EL,  
34 Michurina TV, Enikolopov G: **ΔNp63α is an oncogene that targets chromatin remodeler Lsh**  
35 **to drive skin stem cell proliferation and tumorigenesis.** *Cell stem cell* 2011, **8**(2):164-176.
- 36 12. Rinaldi L, Datta D, Serrat J, Morey L, Solanas G, Avgustinova A, Blanco E, Pons JI, Matallanas  
37 D, Von Kriegsheim A *et al*: **Dnmt3a and Dnmt3b Associate with Enhancers to Regulate**  
38 **Human Epidermal Stem Cell Homeostasis.** *Cell Stem Cell* 2016, **19**(4):491-501.
- 39 13. Qu J, Tanis S, Smits J, Kouwenhoven EN, Oti M, Logie C, Stunnenberg H, Mulder K, Zhou H:  
40 **Mutant p63 affects epidermal cell identity through rewiring the enhancer landscape.** 2018.
- 41 14. Rinne T, Brunner HG, van Bokhoven H: **p63-associated disorders.** *Cell Cycle* 2007, **6**(3):262-  
42 268.
- 43 15. Rinne T, Hamel B, Bokhoven Hv, Brunner HG: **Pattern of p63 mutations and their**  
44 **phenotypes—update.** *American Journal of Medical Genetics Part A* 2006, **140**(13):1396-1406.
- 45 16. Ong C-T, Corces VG: **CTCF: an architectural protein bridging genome topology and function.**  
46 *Nature reviews Genetics* 2014, **15**(4):234.
- 47 17. Kundaje A, Meuleman W, Ernst J, Bilenky M, Yen A, Heravi-Moussavi A, Kheradpour P, Zhang  
48 Z, Wang J, Ziller MJ: **Integrative analysis of 111 reference human epigenomes.** *Nature* 2015,  
49 **518**(7539):317.
- 50 18. Rubin AJ, Barajas BC, Furlan-Magaril M, Lopez-Pajares V, Mumbach MR, Howard I, Kim DS,  
51 Boxer LD, Cairns J, Spivakov M: **Lineage-specific dynamic and pre-established enhancer—**



- 1 **promoter contacts cooperate in terminal differentiation. *Nature genetics* 2017,  
2 **49(10):1522.****
- 3 19. Phanstiel DH, Van Bortle K, Spacek D, Hess GT, Shamim MS, Machol I, Love MI, Aiden EL,  
4 Bassik MC, Snyder MP: **Static and dynamic DNA loops form AP-1-bound activation hubs**  
5 **during macrophage development. *Molecular cell* 2017, **67(6):1037-1048.** e1036.**
- 6 20. Kouwenhoven EN, van Heeringen SJ, Tena JJ, Oti M, Dutilh BE, Alonso ME, de la Calle-  
7 Mustienes E, Smeenk L, Rinne T, Parsaulian L *et al*: **Genome-Wide Profiling of p63 DNA-**  
8 **Binding Sites Identifies an Element that Regulates Gene Expression during Limb**  
9 **Development in the 7q21 SHFM1 Locus. *PLoS Genet* 2010, **6(8).****
- 10 21. Vigano MA, Lamartine J, Testoni B, Merico D, Alotto D, Castagnoli C, Robert A, Candi E,  
11 Melino G, Gidrol X *et al*: **New p63 targets in keratinocytes identified by a genome-wide**  
12 **approach. *Embo J* 2006, **25(21):5105-5116.****
- 13 22. McDade SS, Henry AE, Pivato GP, Kozarewa I, Mitsopoulos C, Fenwick K, Assiotis I, Hakas J,  
14 Zvelebil M, Orr N *et al*: **Genome-wide analysis of p63 binding sites identifies AP-2 factors as**  
15 **co-regulators of epidermal differentiation. *Nucleic Acids Res* 2012, **40(15):7190-7206.****
- 16 23. Sethi I, Sinha S, Buck MJ: **Role of chromatin and transcriptional co-regulators in mediating**  
17 **p63-genome interactions in keratinocytes. *BMC Genomics* 2014, **15:1042.****
- 18 24. Cavazza A, Miccio A, Romano O, Petiti L, Malagoli Tagliazucchi G, Peano C, Severgnini M,  
19 Rizzi E, De Bellis G, Bicciato S *et al*: **Dynamic Transcriptional and Epigenetic Regulation of**  
20 **Human Epidermal Keratinocyte Differentiation. *Stem Cell Reports* 2016, **6(4):618-632.****
- 21 25. Fan X, Wang D, Burgmaier JE, Teng Y, Romano R-A, Sinha S, Yi R: **Single Cell and Open**  
22 **Chromatin Analysis Reveals Molecular Origin of Epidermal Cells of the Skin. *Developmental*  
23 *cell* 2018.**
- 24 26. Soares E, Xu Q, Li Q, Qu J, Zheng Y, Raeven HHM, Brandao K, van den Akker WMR, Tang F,  
25 Zhou H: **Single-cell RNA-seq identifies a reversible epithelial-mesenchymal transition in**  
26 **abnormally specified epithelia of p63 EEC syndrome. *bioRxiv* 2018.**
- 27 27. Yang A, Zhu Z, Kapranov P, McKeon F, Church GM, Gingeras TR, Struhl K: **Relationships**  
28 **between p63 binding, DNA sequence, transcription activity, and biological function in**  
29 **human cells. *Mol Cell* 2006, **24(4):593-602.****
- 30 28. Kouwenhoven EN, van Bokhoven H, Zhou H: **Gene regulatory mechanisms orchestrated by**  
31 **p63 in epithelial development and related disorders. *Biochim Biophys Acta* 2015,  
32 **1849(6):590-600.****
- 33 29. Schwalie PC, Ward MC, Cain CE, Faure AJ, Gilad Y, Odom DT, Flicek P: **Co-binding by YY1**  
34 **identifies the transcriptionally active, highly conserved set of CTCF-bound regions in**  
35 **primate genomes. *Genome biology* 2013, **14(12):R148.****
- 36 30. Beagan JA, Duong MT, Titus KR, Zhou L, Cao Z, Ma J, Lachanski CV, Gillis DR, Phillips-Cremens  
37 JE: **YY1 and CTCF orchestrate a 3D chromatin looping switch during early neural lineage**  
38 **commitment. *Genome research* 2017.**
- 39 31. Chernukhin I, Shamsuddin S, Kang SY, Bergström R, Kwon Y-W, Yu W, Whitehead J,  
40 Mukhopadhyay R, Docquier F, Farrar D: **CTCF interacts with and recruits the largest subunit**  
41 **of RNA polymerase II to CTCF target sites genome-wide. *Molecular and cellular biology*  
42 2007, **27(5):1631-1648.****
- 43 32. Wendt KS, Grosveld FG: **Transcription in the context of the 3D nucleus. *Current opinion in*  
44 *genetics & development* 2014, **25:62-67.****
- 45 33. Fullwood MJ, Wei C-L, Liu ET, Ruan Y: **Next-generation DNA sequencing of paired-end tags**  
46 **(PET) for transcriptome and genome analyses. *Genome research* 2009, **19(4):521-532.****
- 47 34. Mumbach MR, Rubin AJ, Flynn RA, Dai C, Khavari PA, Greenleaf WJ, Chang HY: **HiChIP:**  
48 **efficient and sensitive analysis of protein-directed genome architecture. *Nature methods*  
49 2016, **13(11):919.****

- 1 35. Jin F, Li Y, Dixon JR, Selvaraj S, Ye Z, Lee AY, Yen C-A, Schmitt AD, Espinoza CA, Ren B: **A high-**  
2 **resolution map of the three-dimensional chromatin interactome in human cells.** *Nature*  
3 2013, **503**(7475):290.
- 4 36. Browne G, Cipollone R, Lena AM, Serra V, Zhou H, van Bokhoven H, Dotsch V, Merico D,  
5 Mantovani R, Terrinoni A *et al*: **Differential altered stability and transcriptional activity of**  
6 **DeltaNp63 mutants in distinct ectodermal dysplasias.** *J Cell Sci* 2011, **124**(Pt 13):2200-2207.
- 7 37. Celli J, Duijf P, Hamel BC, Bamshad M, Kramer B, Smits AP, Newbury-Ecob R, Hennekam RC,  
8 Van Buggenhout G, van Haeringen A *et al*: **Heterozygous germline mutations in the p53**  
9 **homolog p63 are the cause of EEC syndrome.** *Cell* 1999, **99**(2):143-153.
- 10 38. Hong J-W, Hendrix DA, Levine MS: **Shadow enhancers as a source of evolutionary novelty.**  
11 *Science* 2008, **321**(5894):1314-1314.
- 12 39. Barolo S: **Shadow enhancers: Frequently asked questions about distributed cis - regulatory**  
13 **information and enhancer redundancy.** *Bioessays* 2012, **34**(2):135-141.
- 14 40. van Bokhoven H, Hamel BC, Bamshad M, Sangiorgi E, Gurrieri F, Duijf PH, Vanmolkot KR, van  
15 Beusekom E, van Beersum SE, Celli J *et al*: **p63 Gene mutations in eec syndrome, limb-**  
16 **mammary syndrome, and isolated split hand-split foot malformation suggest a genotype-**  
17 **phenotype correlation.** *Am J Hum Genet* 2001, **69**(3):481-492.
- 18 41. Rheinwald JG, Green H: **Epidermal growth factor and the multiplication of cultured human**  
19 **epidermal keratinocytes.** *Nature* 1977, **265**(5593):421-424.
- 20 42. Rinne T, Clements SE, Lamme E, Duijf PH, Bolat E, Meijer R, Scheffer H, Rosser E, Tan TY,  
21 McGrath JA *et al*: **A novel translation re-initiation mechanism for the p63 gene revealed by**  
22 **amino-terminal truncating mutations in Rapp-Hodgkin/Hay-Wells-like syndromes.** *Hum*  
23 *Mol Genet* 2008, **17**(13):1968-1977.
- 24 43. Liu NQ, Ter Huurne M, Nguyen LN, Peng T, Wang S-Y, Studd JB, Joshi O, Ongen H, Bramsen JB,  
25 Yan J: **The non-coding variant rs1800734 enhances DCLK3 expression through long-range**  
26 **interaction and promotes colorectal cancer progression.** *Nature communications* 2017,  
27 **8**:14418.
- 28 44. Novakovic B, Habibi E, Wang S-Y, Arts RJ, Davar R, Megchelenbrink W, Kim B, Kuznetsova T,  
29 Kox M, Zwaag J:  **$\beta$ -Glucan Reverses the Epigenetic State of LPS-Induced Immunological**  
30 **Tolerance.** *Cell* 2016, **167**(5):1354-1368. e1314.
- 31 45. Dobin A, Davis CA, Schlesinger F, Drenkow J, Zaleski C, Jha S, Batut P, Chaisson M, Gingeras  
32 TR: **STAR: ultrafast universal RNA-seq aligner.** *Bioinformatics* 2013, **29**(1):15-21.
- 33 46. Anders S, Huber W: **Differential expression analysis for sequence count data.** *Genome Biol*  
34 2010, **11**(10):R106.
- 35 47. Li H, Durbin R: **Fast and accurate short read alignment with Burrows–Wheeler transform.**  
36 *bioinformatics* 2009, **25**(14):1754-1760.
- 37 48. Zhang Y, Liu T, Meyer CA, Eeckhoute J, Johnson DS, Bernstein BE, Nussbaum C, Myers RM,  
38 Brown M, Li W *et al*: **Model-based Analysis of ChIP-Seq (MACS).** *Genome Biol* 2008,  
39 **9**(9):R137.
- 40 49. Ramírez F, Dündar F, Diehl S, Grüning BA, Manke T: **deepTools: a flexible platform for**  
41 **exploring deep-sequencing data.** *Nucleic acids research* 2014, **42**(W1):W187-W191.
- 42 50. Tripathi S, Pohl MO, Zhou Y, Rodriguez-Frandsen A, Wang G, Stein DA, Moulton HM, DeJesus  
43 P, Che J, Mulder LC: **Meta-and orthogonal integration of influenza “OMICs” data defines a**  
44 **role for UBR4 in virus budding.** *Cell host & microbe* 2015, **18**(6):723-735.
- 45 51. Wingett S, Ewels P, Furlan-Magaril M, Nagano T, Schoenfelder S, Fraser P, Andrews S: **HiCUP:**  
46 **pipeline for mapping and processing Hi-C data.** *F1000Research* 2015, **4**.
- 47 52. Cairns J, Freire-Pritchett P, Wingett SW, Várnai C, Dimond A, Plagnol V, Zerbino D,  
48 Schoenfelder S, Javierre B-M, Osborne C: **HiCAGO: robust detection of DNA looping**  
49 **interactions in Capture Hi-C data.** *Genome biology* 2016, **17**(1):127.

50

51

## 1 Figures

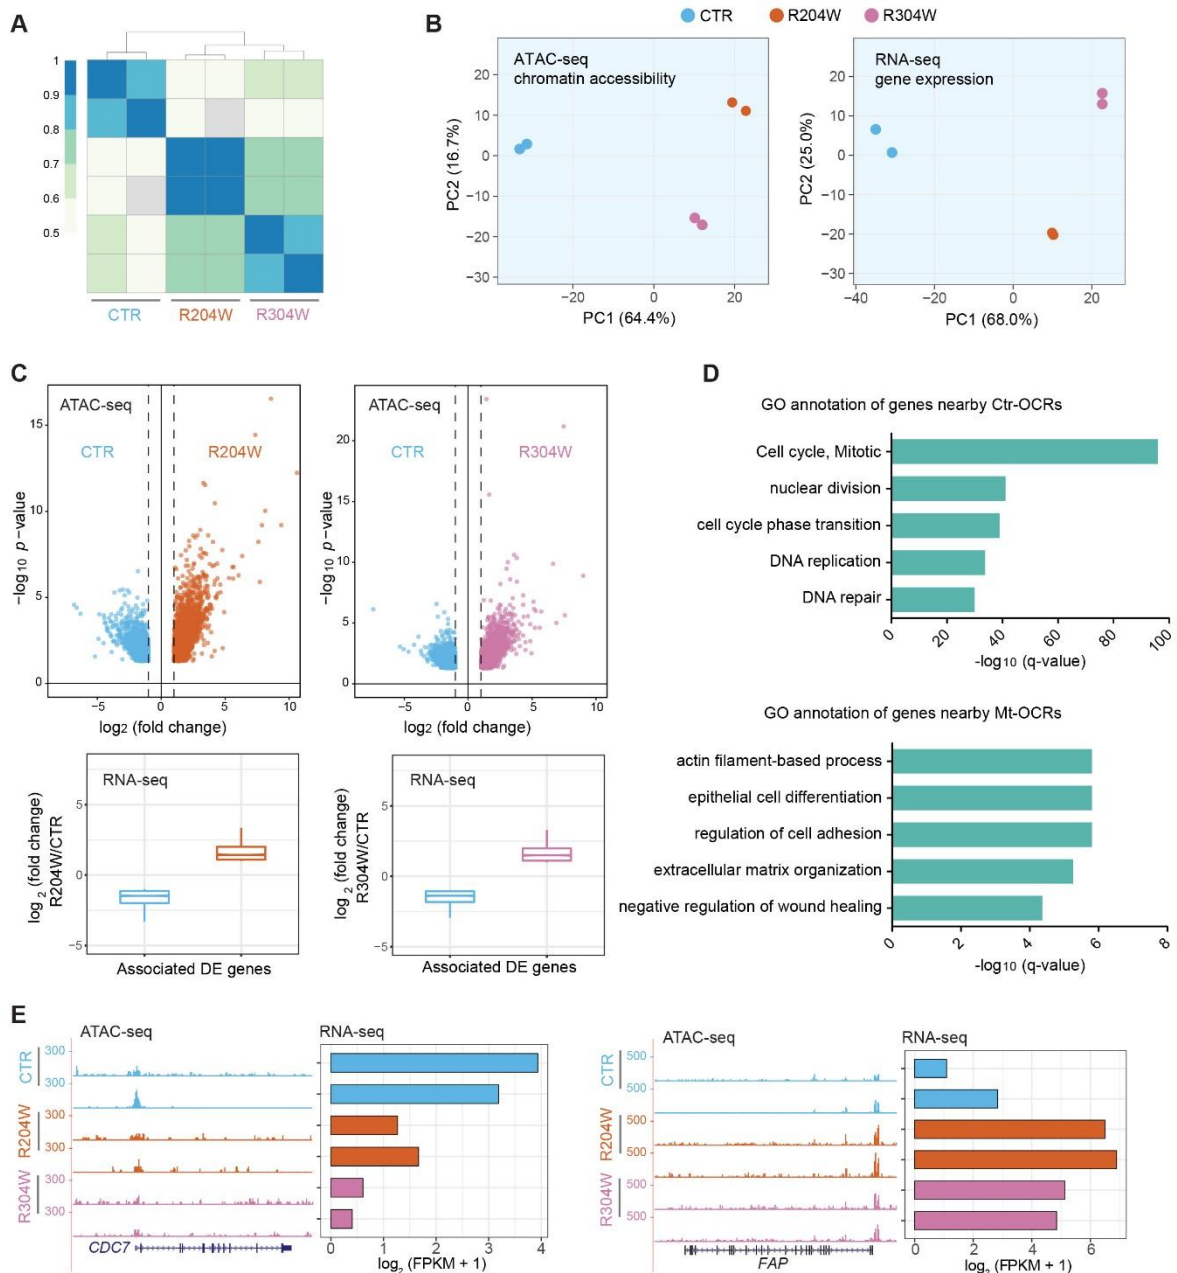

2

### 3 Figure 1. Differential chromatin accessibility in p63 mutant keratinocytes

4 A. A heatmap of sample correlation matrix showing high similarities between duplicates and  
5 dissimilarities between control (CTR) and p63 mutant keratinocytes (R204W and R304W).

6 B. PCA plots of ATAC-seq and RNA-seq of control and p63 mutant keratinocytes at the  
7 proliferation stage.

8 C. Upper panel, volcano plots of ATAC-seq comparisons between control and p63 mutant  
9 keratinocytes. The x axis shows the log<sub>2</sub> fold change of reads detected at the open  
10 chromatin regions (OCRs) and the y axis shows -log<sub>10</sub> (p value). Lower panel, the

- 1 transcriptional changes of differentially expressed genes associated with differential OCRs
- 2 indicated in the volcano plots.
- 3 D. GO annotation of differentially expressed genes nearby Ctr-OCRs and Mt-OCRs.
- 4 E. Examples of Ctr-OCRs and their associated DE gene, *CDC7*, as well as Mt-OCRs and their
- 5 associated DE gene, *FAP*. ATAC-seq tracks are shown in the RPKM scale.
- 6

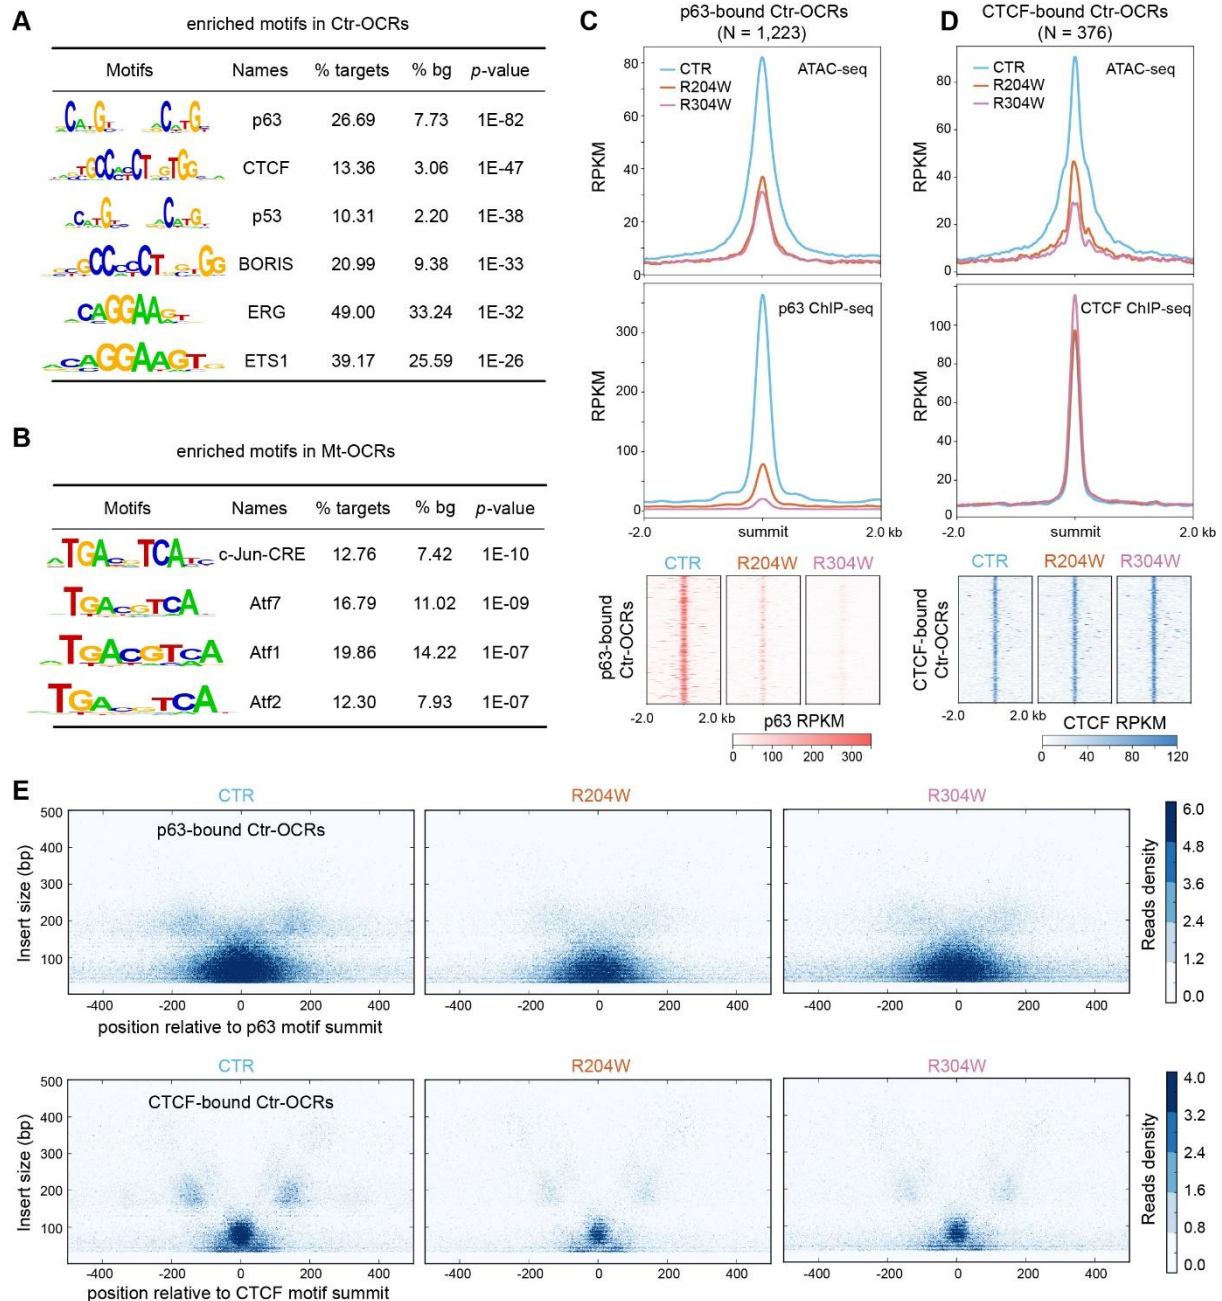

1

2 **Figure 2. Decreased chromatin accessibility and altered nucleosome organization at p63-bound**  
 3 **OCRs and CTCF-bound OCRs in p63 mutant keratinocytes**

4 A. Top enriched motifs in Ctr-OCRs. 2,492 Ctr-OCRs (targets) were used in this analysis with Mt-  
 5 OCRs as background (bg).

6 B. Top enriched motifs in Mt-OCRs. 3,716 Mt-OCRs (targets) were used in this analysis with Ctr-  
 7 OCRs as background (bg).

8 C. Bandplots (top) and heatmaps (bottom) showing the quantification of ATAC-seq and p63  
 9 ChIP-seq signals at the 1,223 p63-bound Ctr-OCRs.

- 1 D. Bandplots (top) and heatmaps (bottom) showing the quantification of ATAC-seq and CTCF
- 2 CHIP-seq signals at the 376 CTCF-bound Ctr-OCRs.
  
- 3 E. V-plot of ATAC-seq reads showing the read length and distance from either p63 motif (top)
- 4 or CTCF motif (bottom) in control and p63 mutant keratinocytes. The short fragments (<150
- 5 bp) were indicative of nucleosome free DNA.

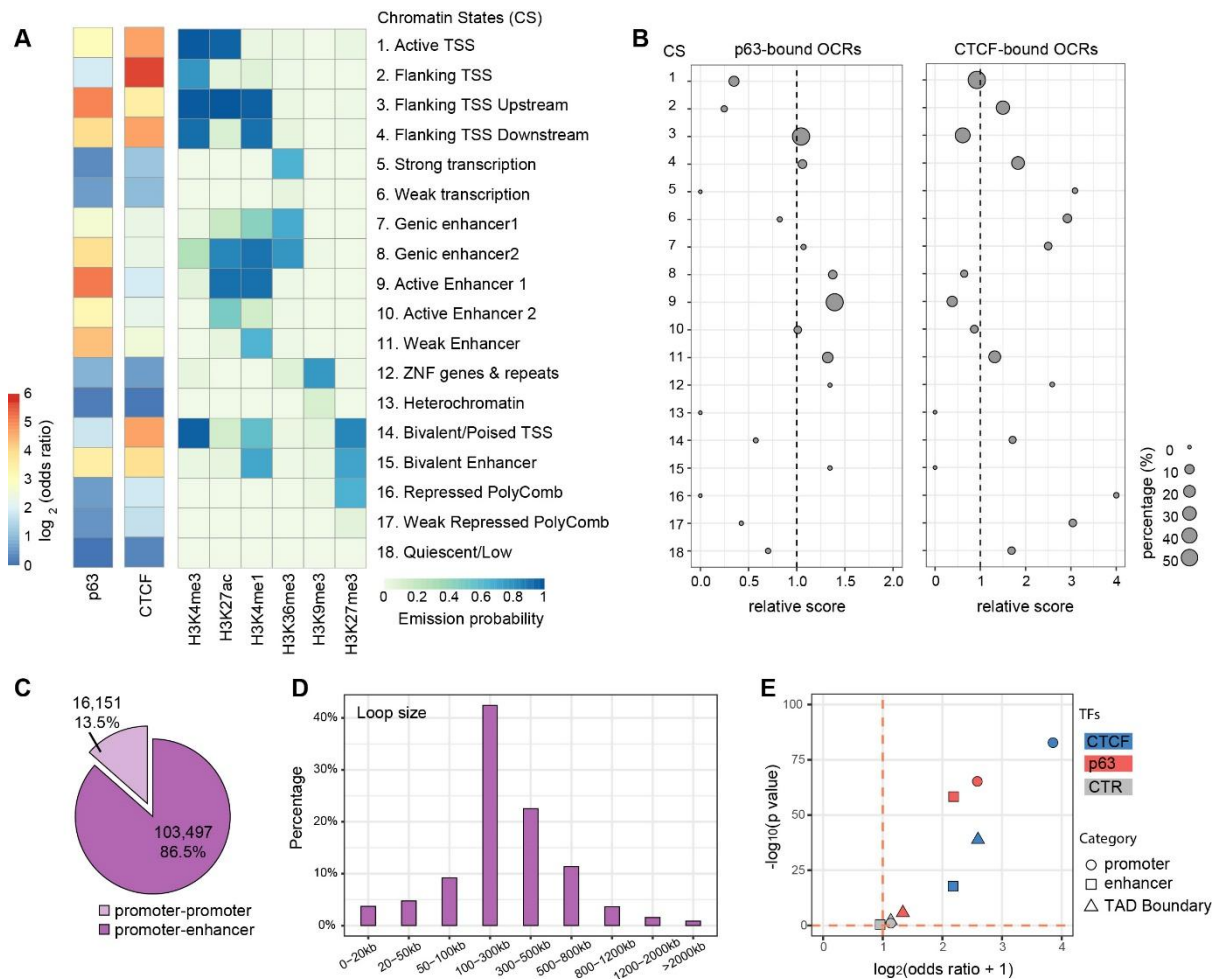

**Figure 3. Chromatin state and locations of p63- and CTCF-bound OCRs**

- A. Fold enrichment/depletion of chromatin states (CSs) in p63 BSs and CTCF BSs compared to the randomized sequences. The 18 CSs were defined using ENCODE data [17].
- B. Relative enrichment (> 1)/depletion (< 1) of CSs in p63-bound Ctr-OCRs and CTCF-bound Ctr-OCRs compared to all Ctr-OCRs. The circle size represents the percentage of either p63-bound Ctr-OCRs (left) or CTCF-bound Ctr-OCRs (right) in each CS. Relative score is calculated by comparing odds ratios between two overlap tests, in which odds ratio is estimated by BEDtools *fisher* option.
- C. Percentage of different loop types defined in the PCHiC data.
- D. Size distribution of promoter-enhancer loops in the PCHiC data.
- E. Estimated enrichment of CTCF and p63 at promoters, enhancers, or TAD Boundary compared to the reshuffled sequences (CTR). Odds ratio indicates the enrichment (> 1)/depletion (< 1) of two independent peak lists calculated by BEDtools *fisher* option.

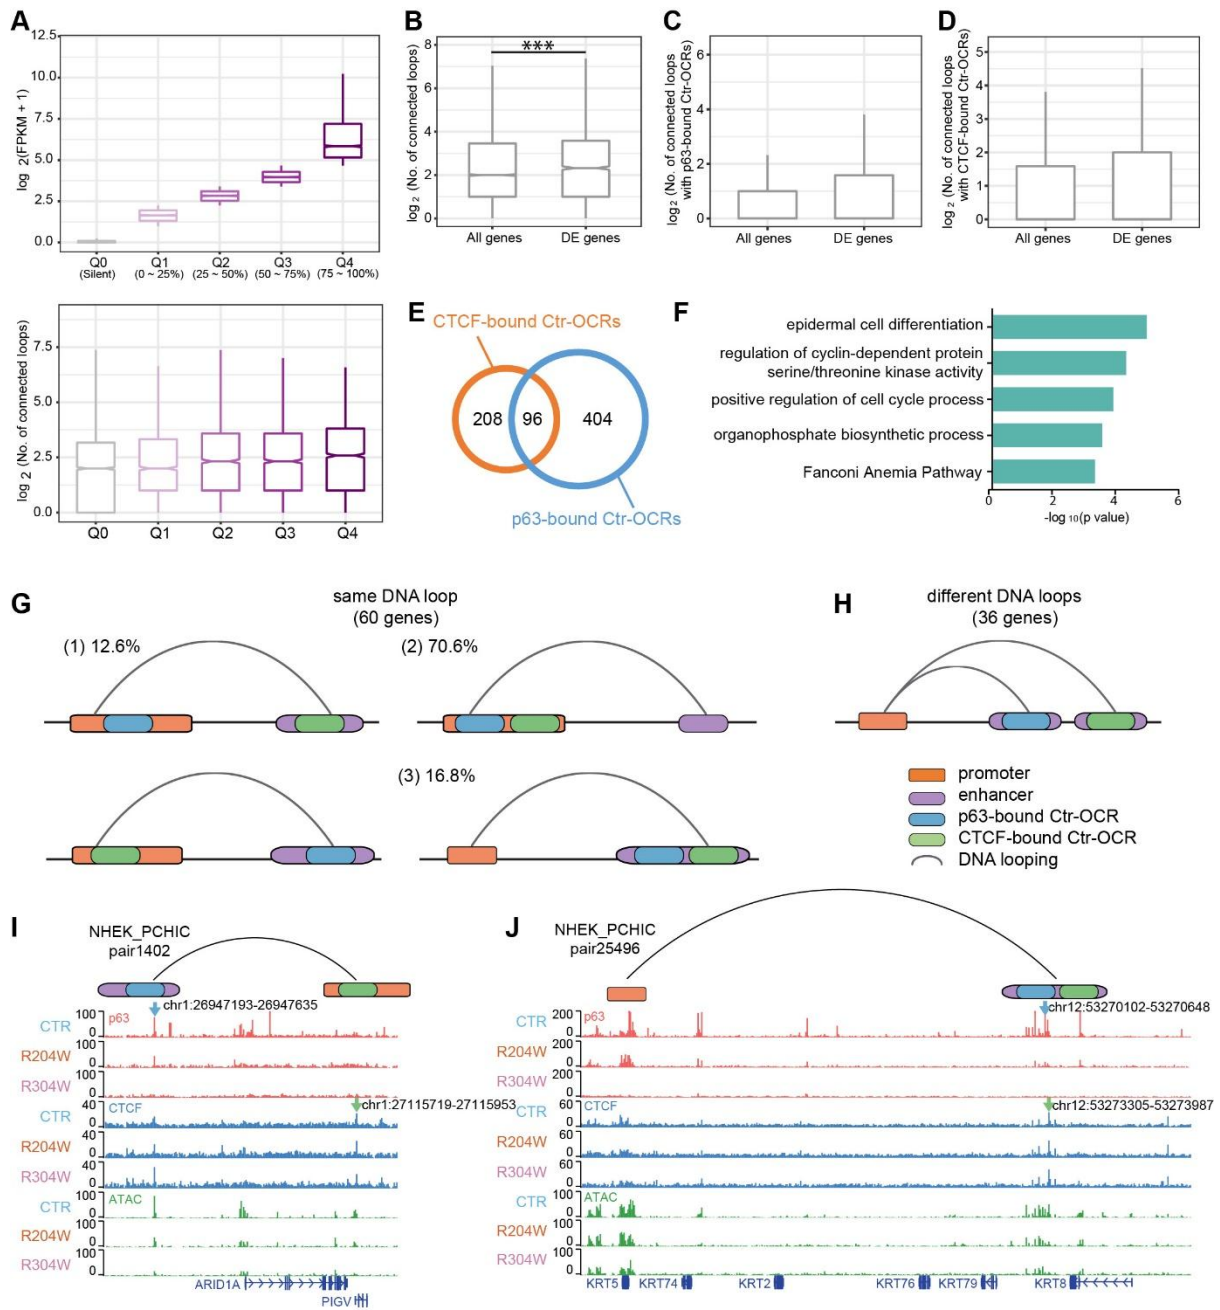

1

2 **Figure 4. p63- and CTCF-bound Ctr-OCRs are involved in chromatin loops regulating epidermal**  
 3 **genes.**

4 A. Highly expressed genes are associated with more DNA loops. Genes were divided in quarters  
 5 according to their expression levels in keratinocytes. The number of connected DNA loops  
 6 associated with each group of genes were plotted in the bottom bar chart.

7 B. DE genes were associated with more connected DNA loops when compared to all expressed  
 8 genes. **\*\*\***,  $p < 0.001$ , Wilcoxon signed-rank test.

9 C. DE genes were associated with more connected DNA loops with p63-bound Ctr-OCRs when  
 10 compared to all expressed genes.



- 1 D. DE genes were associated with more connected DNA loops with CTCF-bound Ctr-OCRs when  
2 compared to all expressed genes.
- 3 E. Overlapping of genes mapped by CTCF-bound Ctr-OCRs (orange) and p63-bound Ctr-OCRs  
4 (blue).
- 5 F. GO annotation of the 96 genes potentially co-regulated by p63 and CTCF.
- 6 G. p63-bound and CTCF-bound Ctr-OCRs were involved in the same or different loops  
7 connecting the promoters of the 96 genes. 60 genes were regulated by the same loops with  
8 both p63-bound and CTCF-bound Ctr-OCRs: (1) in 12.6% cases, p63-bound Ctr-OCR located  
9 at one anchor while CTCF-bound Ctr-OCR located at the other anchor of the loop; in the  
10 majority cases, p63-bound and CTCF-bound Ctr-OCRs were both present at the (2) promoter  
11 (70.6%) or (3) enhancer (16.8%) of the DNA loops.
- 12 H. The left 36 genes were co-regulated by connecting DNA loops with p63-bound and CTCF-  
13 bound Ctr-OCRs at enhancers of different loops.
- 14 I. *PIGV* is shown as an example of G (1), which is connected by the DNA loop pair1402,  
15 bridging the *PIGV* promoter (with a CTCF-bound Ctr-OCR) and a distal enhancer (with a p63-  
16 bound Ctr-OCR).
- 17 J. *KRT5* is shown as an example of G (3), which is connected by the DNA loop pair25496,  
18 bridging the *KRT5* promoter and a distal enhancer (with both CTCF-bound and p63-bound  
19 Ctr-OCRs). The blue arrows pointed to the p63 BSs while the green arrows pointed to the  
20 CTCF BSs.

21  
22  
23

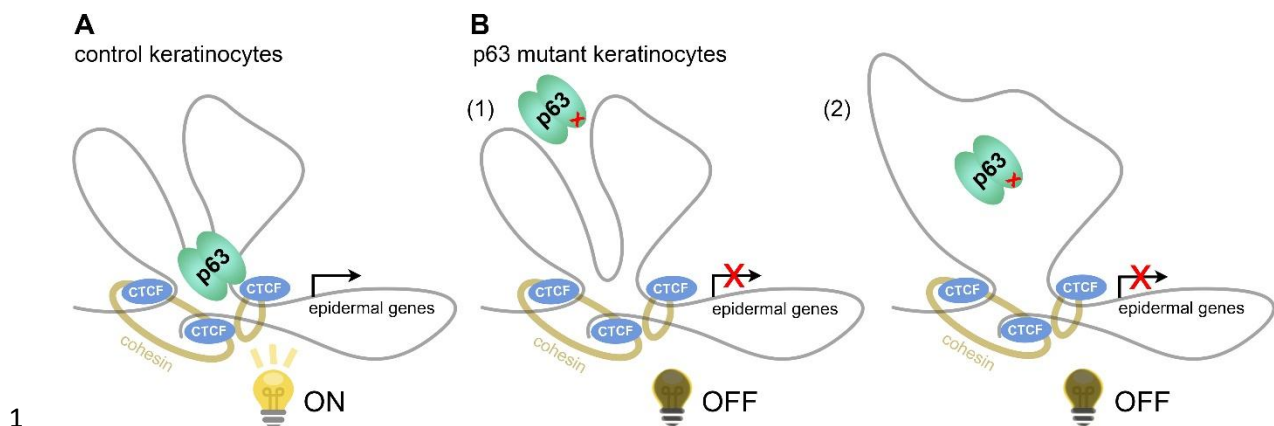

1  
2 **Figure 5. Models of how p63 and CTCF co-mediate chromatin loops regulating epidermal genes.**

- 3       A. In control keratinocytes, p63 and CTCF co-mediate a subset of DNA loops nearby epidermal  
4       genes and regulate their gene expression.
- 5       B. In p63 mutant keratinocytes, due to the loss of p63 binding, p63 and CTCF co-mediated DNA  
6       loops are not functional anymore, and therefore epidermal genes are deregulated. There are  
7       two possibilities in deregulated function of looping: (1) the looping structure is stable as  
8       CTCF binding is unchanged; (2) the looping structure is partially changed because of loss of  
9       p63 binding and loss of the p63-dependent loop.

10

11

## 1 Supplementary Figures

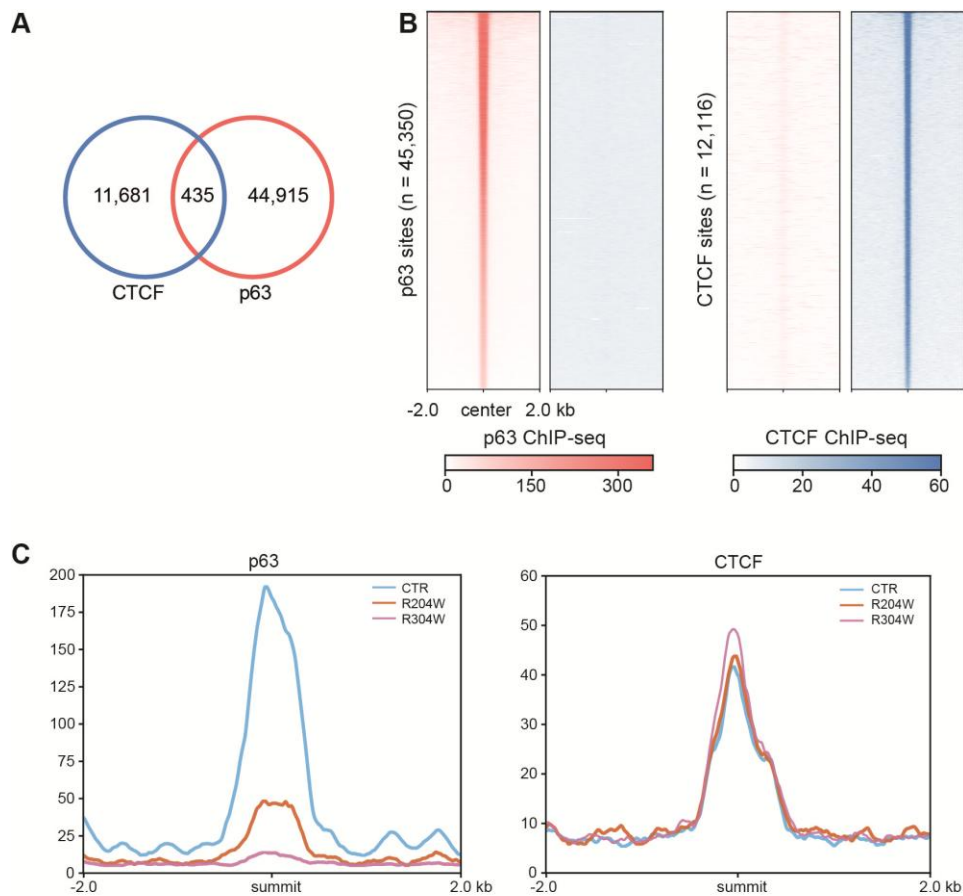

2

### 3 Supplementary Figure 1. Few overlap between p63 and CTCF binding sites.

4 A. Overlapping of p63 and CTCF binding sites from ChIP-seq data

5 B. Heatmaps showing the CTCF binding signal at all 45,350 p63 binding sites (left) and the p63  
6 binding signal at all 12,116 CTCF binding sites (right).

7 C. Bandplots showing the p63 binding signal (left) and CTCF binding signal (right) at the 435 co-  
8 binding sites in both control and p63 mutant keratinocytes.

9

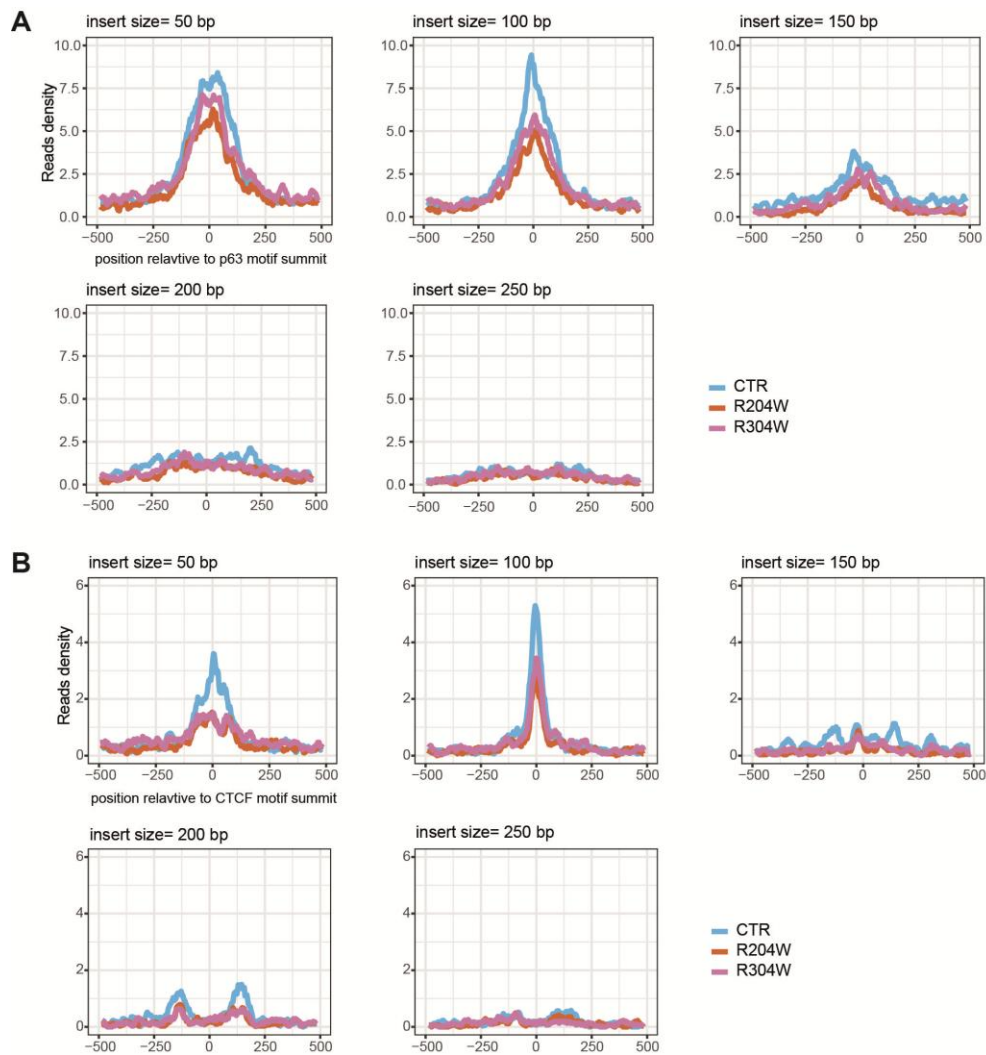

1

2 **Supplementary Figure 2. Deregulated nucleosome organization at p63-bound and CTCF-bound Ctr-**  
3 **OCRs in p63 mutant keratinocytes.**

4 D. Reads density of ATAC-seq at p63-bound Ctr-OCRs with different insert sizes in both control  
5 and p63 mutant keratinocytes.

6 E. Reads density of ATAC-seq at CTCF-bound Ctr-OCRs with different insert sizes in both control  
7 and p63 mutant keratinocytes.

8

9

10

11

12

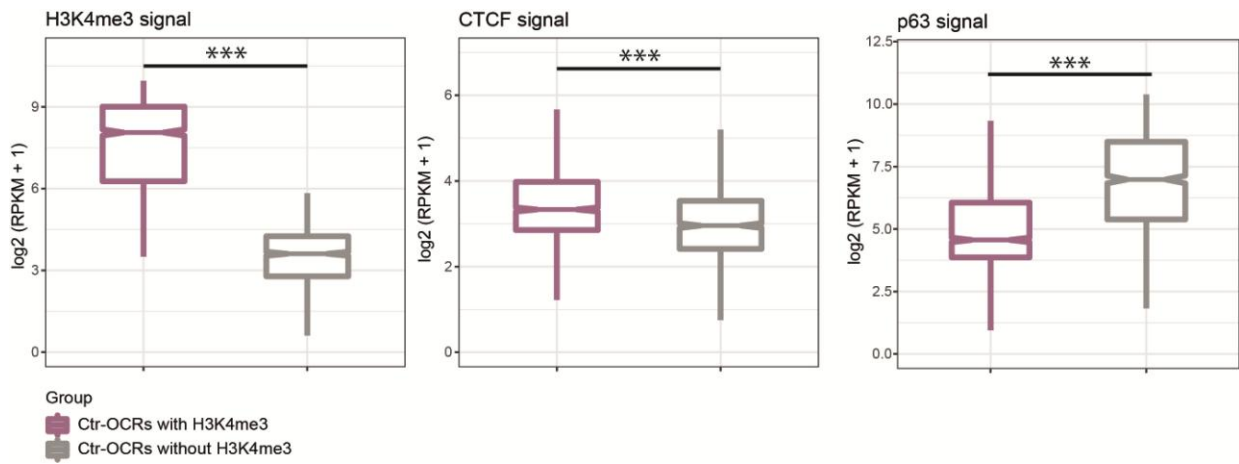

1

2 **Supplementary Figure 3. CTCF bound preferentially to Ctr-OCRs marked by H3K4me3.**

3 Ctr-OCRs are grouped into two categories according to H3K4me3 signal, Ctr-OCRs with H3K4me3  
4 (purple) and Ctr-OCRs without H3K4me3 (gray). CTCF ChIP-seq showed higher signal in Ctr-OCRs with  
5 H3K4me3 while p63 ChIP-seq showed higher signal in Ctr-OCRs without H3K4me3 in control  
6 keratinocytes. \*\*\*,  $p < 0.001$ , Wilcoxon signed-rank test.

7
